# Supplementary material for: Soybean phytochemicals responsible for bacterial neuraminidase inhibition and their characterization by UPLC-ESI-TOF/MS
Source: Royal Society of Chemistry journal article supplement (doi:10.1039/d2fo00537a), 2022-01-01
Supplement: d2fo00537a1.pdf [file d2fo00537a1.pdf]

**Supplementary data**

**Soybean phytochemicals responsible for the bacterial neuraminidase  
inhibition and their characterization by UPLC-ESI-TOF/MS**

Yeong Jun Ban<sup>a,1</sup>, Aizhamal Baiseitova<sup>a,1</sup>, Jeong Yoon Kim<sup>b</sup>, Gihwan Lee<sup>a</sup>, Abdul Bari Shah<sup>a</sup>,  
Jeong Ho Kim<sup>a</sup>, Yong Hyun Lee<sup>a</sup>, Ki Hun Park<sup>a,\*</sup>

*<sup>a</sup>Division of Applied Life Science (BK21 plus), IALS, Gyeongsang National University, Jinju,  
52828, Republic of Korea*

*<sup>b</sup>Department of Pharmaceutical Engineering, IALS, Gyeongsang National University, Jinju,  
Republic of Korea*

**Correspondence to:**

Prof. Dr. Ki Hun Park, Division of Applied Life Science (BK21 plus), IALS, Gyeongsang  
National University, Jinju 52828, Republic of Korea.

E-mail: [khpark@gnu.ac.kr](mailto:khpark@gnu.ac.kr) Phone: +82-55-772-1965 Fax +82-55-772-1969

<sup>1</sup>These authors contributed equally to this work.

**Table S1**

Peak assignments and mass spectra of metabolite in soybean extract from positive mode using UPLC–ESI-TOF/MS.

| No. | Retention times (min) | Compounds           | Elemental composition                            | Calculated mass [M] ( <i>m/z</i> ) | Calculated mass [M+H] <sup>+</sup> ( <i>m/z</i> ) | Observed mass [M+H] <sup>+</sup> ( <i>m/z</i> ) | Fragmentation ions | References                                        |
|-----|-----------------------|---------------------|--------------------------------------------------|------------------------------------|---------------------------------------------------|-------------------------------------------------|--------------------|---------------------------------------------------|
| 1   | 1.95                  | tryptophan fragment | C <sub>11</sub> H <sub>12</sub> N <sub>2</sub> O | 187.0871                           | 188.0950                                          | 188.0698                                        | 146.0592           | Kim et al., 2013                                  |
| 2   | 2.22                  | phenylalanine       | C <sub>9</sub> H <sub>11</sub> NO <sub>2</sub>   | 165.0790                           | 166.0863                                          | 166.0856                                        | 120.0799           | Gu et al., 2017                                   |
| 3   | 2.84                  | daidzin             | C <sub>21</sub> H <sub>20</sub> O <sub>9</sub>   | 416.1107                           | 417.1189                                          | 417.1171                                        | 255.0641           | Duenas et al., 2012; Shen et al., 2012            |
| 4   | 2.96                  | glycitin            | C <sub>22</sub> H <sub>22</sub> O <sub>10</sub>  | 446.1213                           | 447.1272                                          | 447.1280                                        | 285.0747           | Duenas et al., 2012; Shen et al., 2012            |
| 5   | 3.92                  | genistin            | C <sub>21</sub> H <sub>20</sub> O <sub>10</sub>  | 432.1056                           | 433.1126                                          | 433.1122                                        | 271.0590           | Duenas et al., 2012; Shen et al., 2012            |
| 6   | 4.10                  | malonyldaidzin      | C <sub>24</sub> H <sub>22</sub> O <sub>12</sub>  | 502.1111                           | 503.1191                                          | 503.1174                                        | 255.0641           | Duenas et al., 2012; Shen et al., 2012            |
| 7   | 4.17                  | malonylglycitin     | C <sub>25</sub> H <sub>24</sub> O <sub>13</sub>  | 532.1217                           | 533.1297                                          | 533.1283                                        | 285.0748           | Duenas et al., 2012; Shen et al., 2012            |
| 8   | 5.02                  | acetyldaidzin       | C <sub>22</sub> H <sub>22</sub> O <sub>9</sub>   | 458.1213                           | 459.1286                                          | 459.1283                                        | 255.0645           | Duenas et al., 2012; Shen et al., 2012            |
| 9   | 5.33                  | malonylgenistin     | C <sub>24</sub> H <sub>22</sub> O <sub>13</sub>  | 518.1060                           | 519.1139                                          | 519.1123                                        | 271.0590           | Duenas et al., 2012; Shen et al., 2012            |
| 10  | 6.11                  | daidzein            | C <sub>15</sub> H <sub>10</sub> O <sub>4</sub>   | 254.0579                           | 255.0652                                          | 255.0641                                        |                    | Duenas et al., 2012; Shen et al., 2012            |
| 11  | 10.12                 | soyasaponin Ab      | C <sub>24</sub> H <sub>22</sub> O <sub>13</sub>  | 1436.6460                          | 1437.6503                                         | 1437.6503                                       | 975.5152           | Decroos et al., 2005; Ha et al., 2014             |
| 12  | 10.26                 | soyasaponin Ac      | C <sub>67</sub> H <sub>104</sub> O <sub>32</sub> | 1420.6511                          | 1421.6506                                         | 1421.6551                                       | 959.5202           | Decroos et al. 2005                               |
| 13  | 10.71                 | soyasaponin Af      | C <sub>25</sub> H <sub>24</sub> O <sub>12</sub>  | 1274.5932                          | 1275.5915                                         | 1275.5959                                       | 813.4637           | Decroos et al. 2005, Guajardo-Flores et al., 2012 |
| 14  | 11.11                 | soyasaponin J-αa    | C <sub>51</sub> H <sub>78</sub> O <sub>23</sub>  | 1028.4828                          | 1029.5255                                         | 1029.5238                                       | 423.3614           | Krishnamurthy et al., 2014                        |
| 15  | 11.47                 | soyasaponin Ba      | C <sub>48</sub> H <sub>78</sub> O <sub>19</sub>  | 958.5137                           | 959.5189                                          | 959.5190                                        | 441.3725           | Decroos et al. 2005, Guajardo-Flores et al., 2012 |
| 16  | 11.72                 | soyasaponin Bb      | C <sub>48</sub> H <sub>78</sub> O <sub>18</sub>  | 942.5188                           | 943.5243                                          | 943.5244                                        | 441.3720           | Decroos et al. 2005, Guajardo-Flores et al., 2012 |
| 17  | 12.09                 | soyasaponin Bb'     | C <sub>42</sub> H <sub>67</sub> O <sub>14</sub>  | 796.4609                           | 797.4665                                          | 797.4689                                        | 441.3729, 423.3624 | Decroos et al. 2005, Guajardo-Flores et al., 2012 |
| 18  | 12.09                 | soyasaponin Bc      | C <sub>47</sub> H <sub>76</sub> O <sub>17</sub>  | 912.5083                           | 913.5133                                          | 913.5159                                        | 441.3730, 423.3623 | Decroos et al. 2005                               |
| 19  | 12.09                 | soyasaponin J-αg    | C <sub>51</sub> H <sub>78</sub> O <sub>23</sub>  | 1058.4934                          | 1059.5704                                         | 1059.5709                                       | 423.3622           | Krishnamurthy et al., 2014                        |
| 20  | 12.64                 | soyasaponin Bd      | C <sub>48</sub> H <sub>76</sub> O <sub>19</sub>  | 956.4981                           | 957.5037                                          | 957.5032                                        | 439.3567           | Decroos et al. 2005, Guajardo-Flores et al., 2012 |
| 21  | 12.76                 | soyasaponin αg      | C <sub>54</sub> H <sub>84</sub> O <sub>22</sub>  | 1084.5454                          | 1085.5491                                         | 1085.5492                                       | 567.4040, 423.3614 | Decroos et al. 2005, Guajardo-Flores et al., 2012 |
| 22  | 12.91                 | soyasaponin Be      | C <sub>48</sub> H <sub>76</sub> O <sub>18</sub>  | 940.5032                           | 941.5095                                          | 941.5091                                        | 439.3563           | Decroos et al. 2005                               |
| 23  | 13.04                 | soyasaponin βg      | C <sub>54</sub> H <sub>84</sub> O <sub>21</sub>  | 1068.5505                          | 1069.5554                                         | 1069.5556                                       | 567.4042, 423.3615 | Decroos et al. 2005, Guajardo-Flores et al., 2012 |
| 24  | 13.33                 | soyasaponin βa      | C <sub>47</sub> H <sub>76</sub> O <sub>17</sub>  | 1038.5399                          | 1039.5430                                         | 1039.5449                                       | 567.4040, 423.3615 | Guajardo-Flores et al., 2012                      |
| 25  | 13.66                 | soyasaponin γg      | C <sub>48</sub> H <sub>74</sub> O <sub>17</sub>  | 922.4926                           | 923.4999                                          | 923.4984                                        | 567.4041, 423.3616 | Decroos et al. 2005, Guajardo-Flores et al., 2012 |
| 26  | 13.83                 | soyasaponin γa      | C <sub>47</sub> H <sub>72</sub> O <sub>16</sub>  | 892.4877                           | 893.4851                                          | 893.4877                                        | 567.4072, 423.3623 | Guajardo-Flores et al., 2012                      |

**Table S2**Fluorescence quenching effects of compounds **1a** and **2a** on BNA.

| <b>Compounds</b> | $K_{SV} (\times 10^5 \text{ L}\cdot\text{mol}^{-1})$ | $K_A (\times 10^5 \text{ L}\cdot\text{mol}^{-1})$ | $n$  |
|------------------|------------------------------------------------------|---------------------------------------------------|------|
| <b>1a</b>        | 0.08                                                 | 0.19                                              | 0.92 |
| <b>2a</b>        | 0.17                                                 | 0.22                                              | 0.98 |

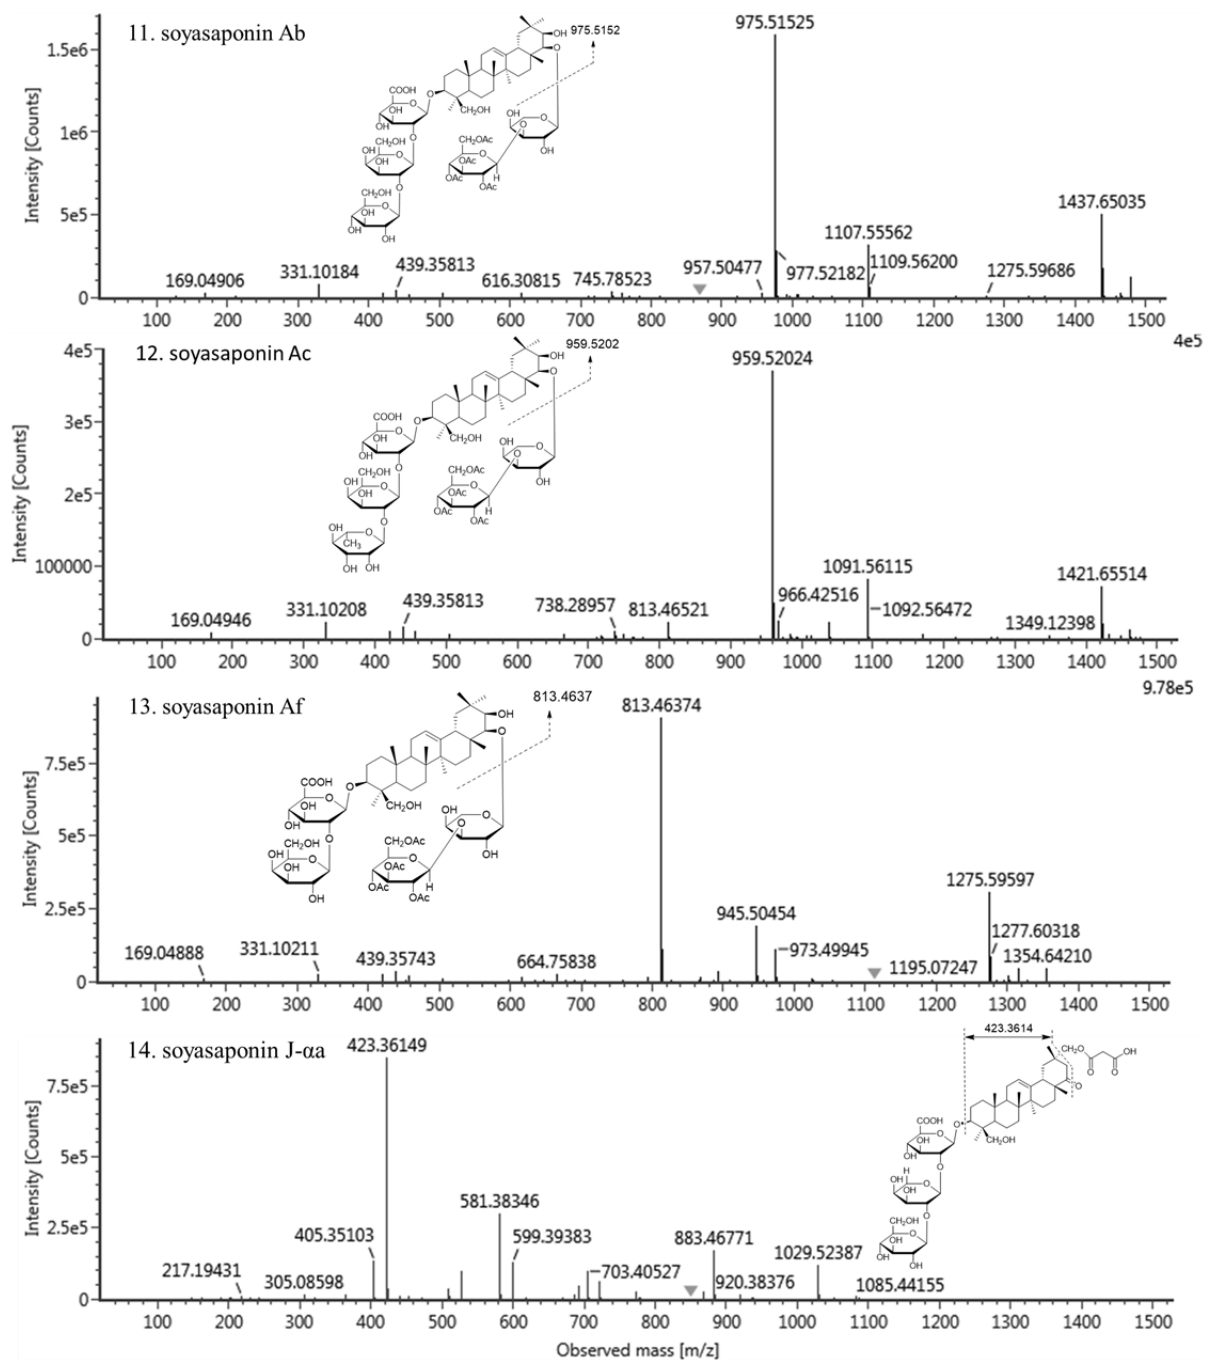

**Fig. S1.** Mass fragmentation patterns of the identified soyasaponins by mass spectra Mass.

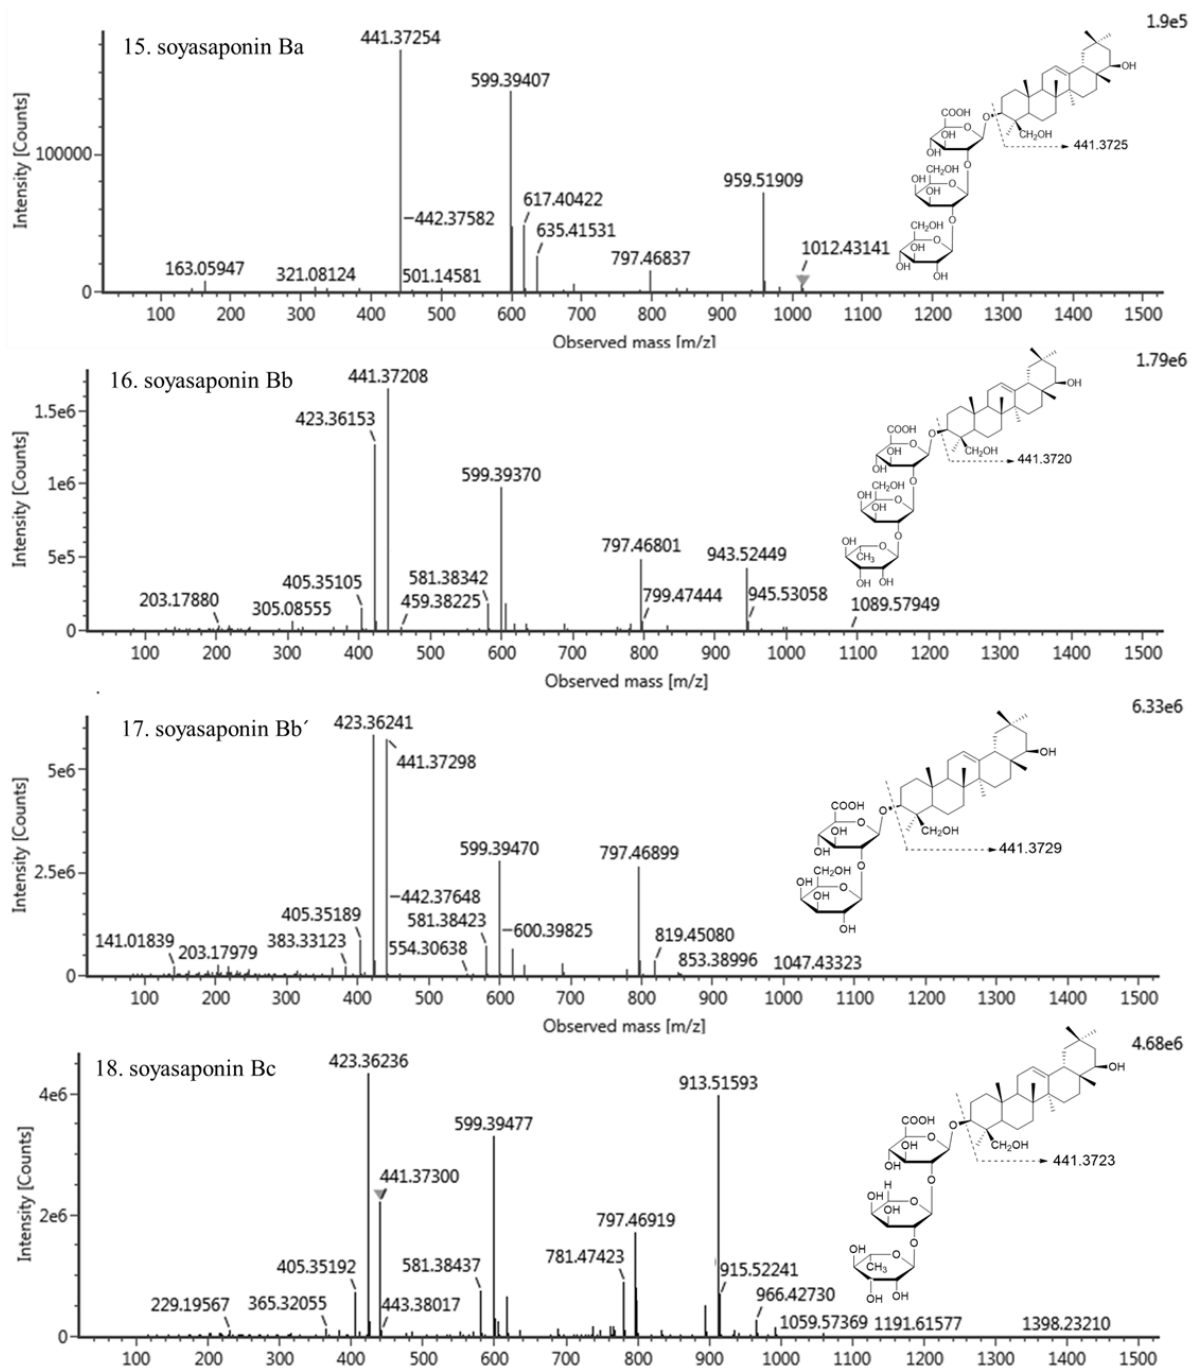

**Fig. S2.** Mass fragmentation patterns of the identified soyasaponins by mass spectra Mass.

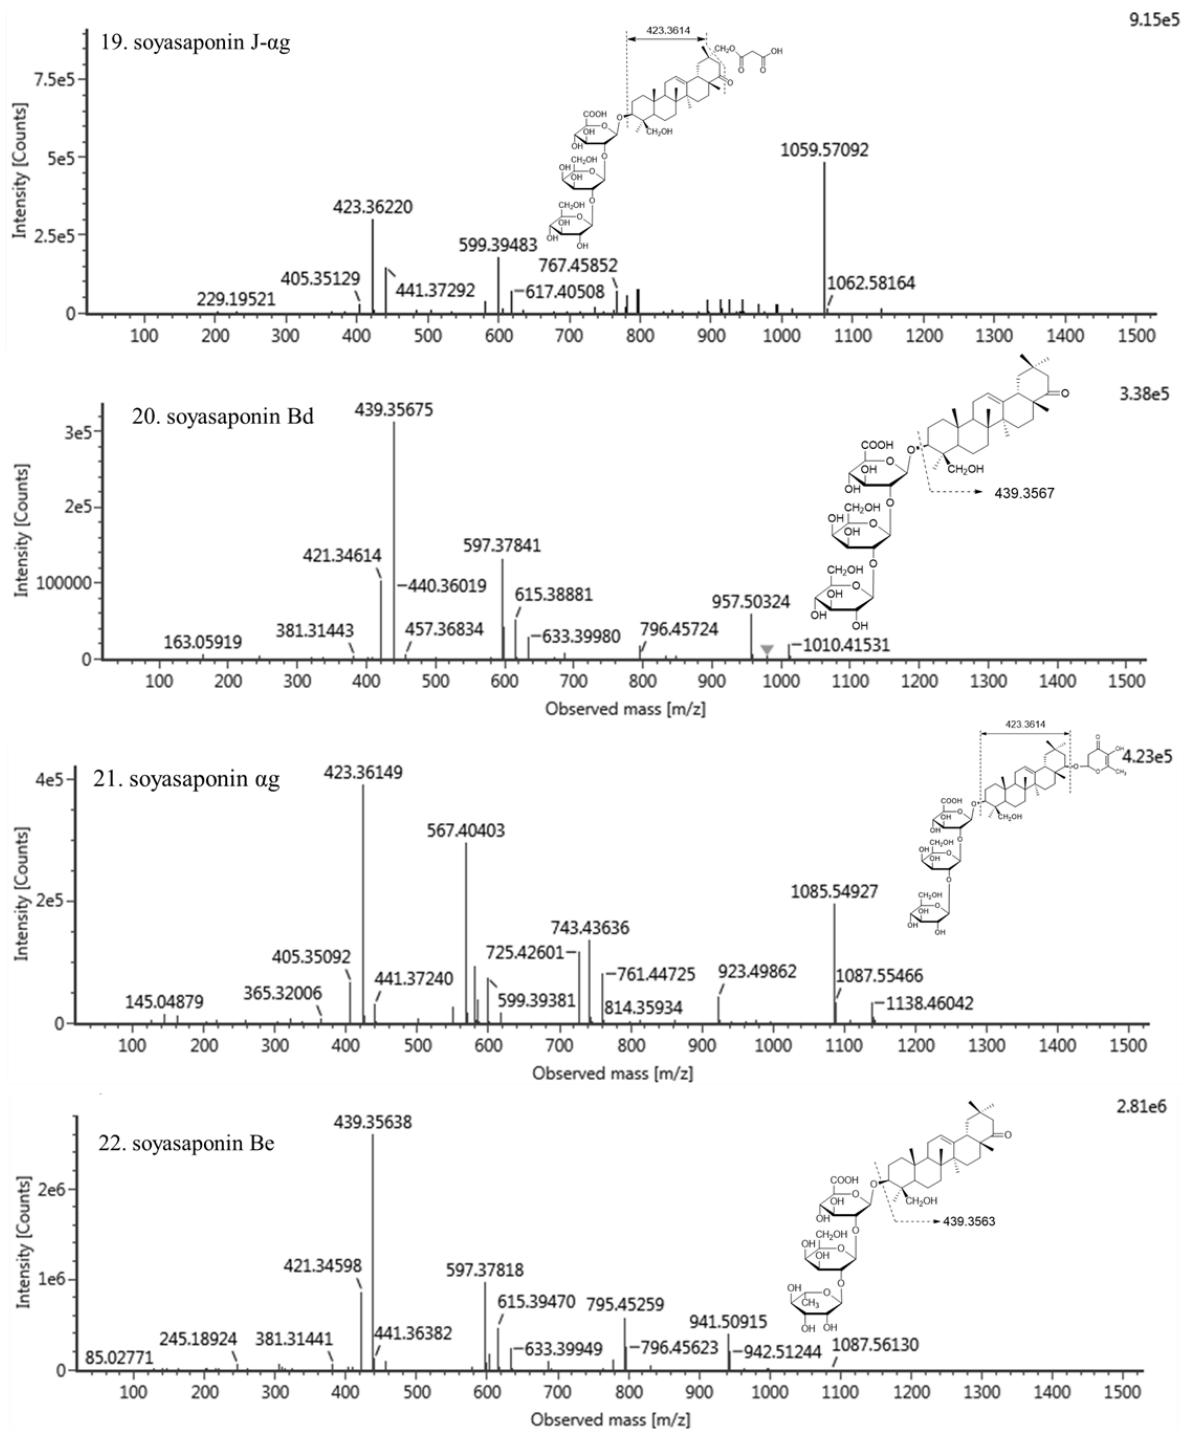

**Fig. S3.** Mass fragmentation patterns of the identified soyasaponins by mass spectra Mass.

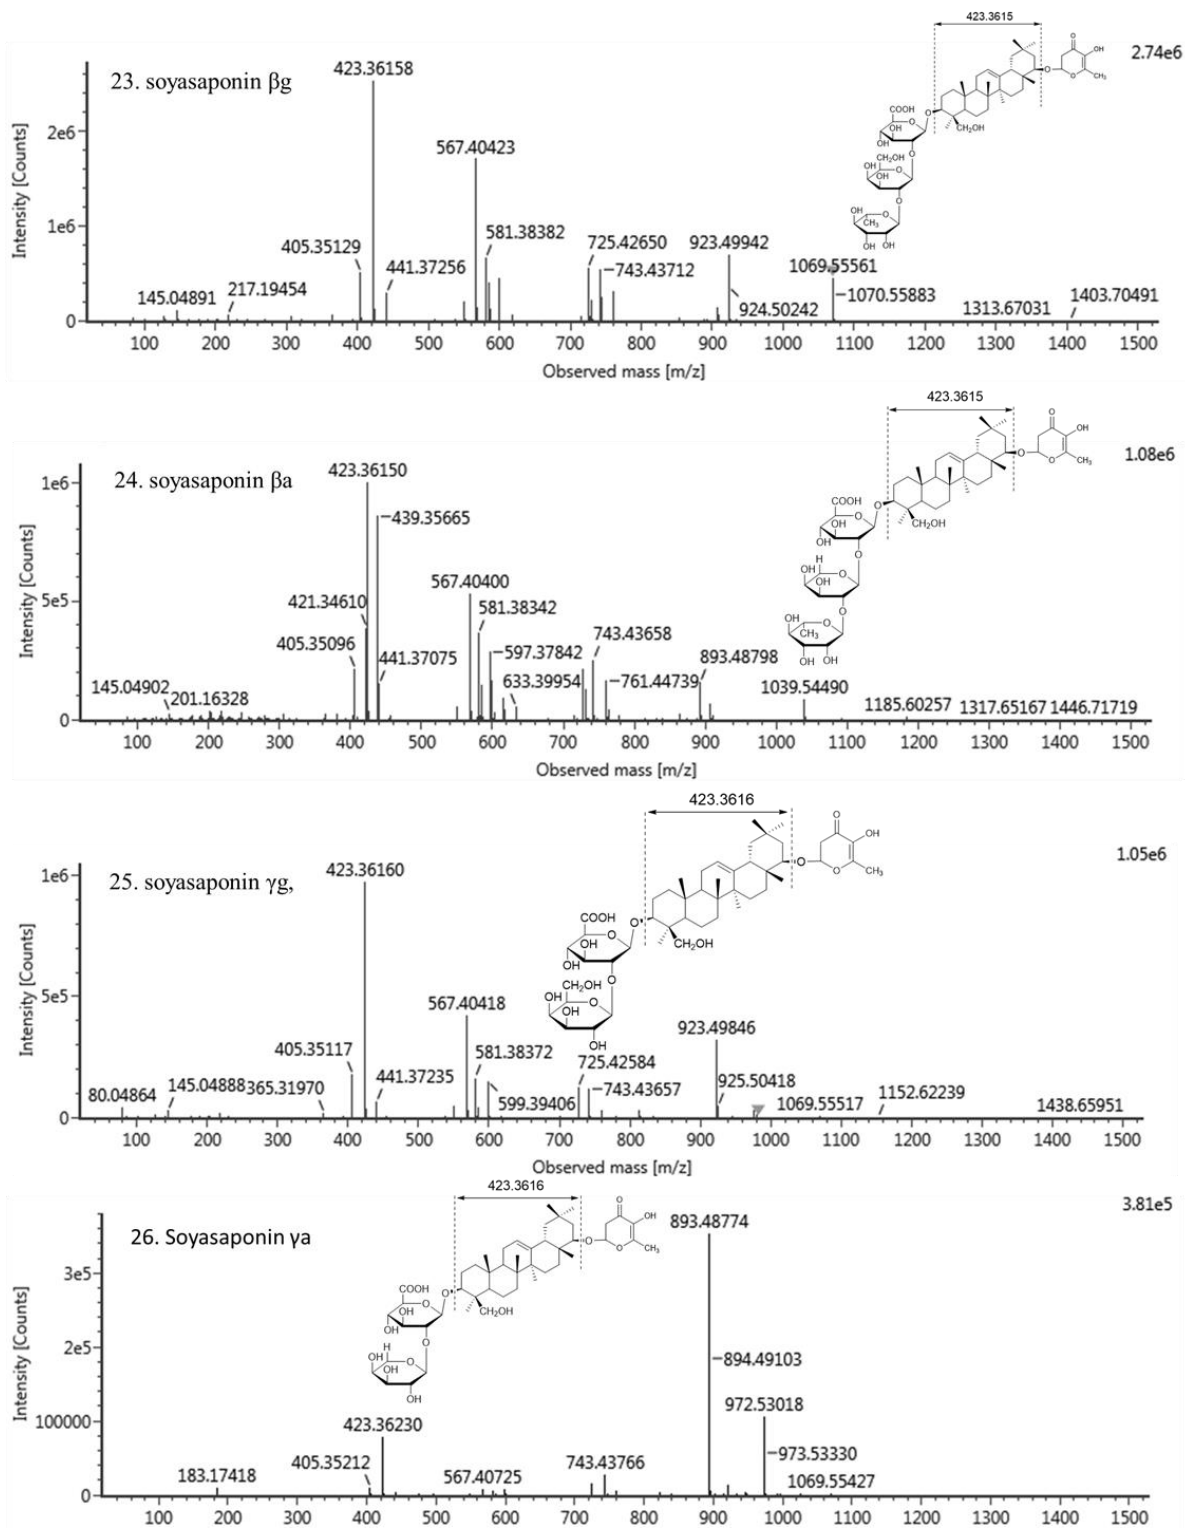

**Fig. S4.** Mass fragmentation patterns of the identified soyasaponins by mass spectra Mass.

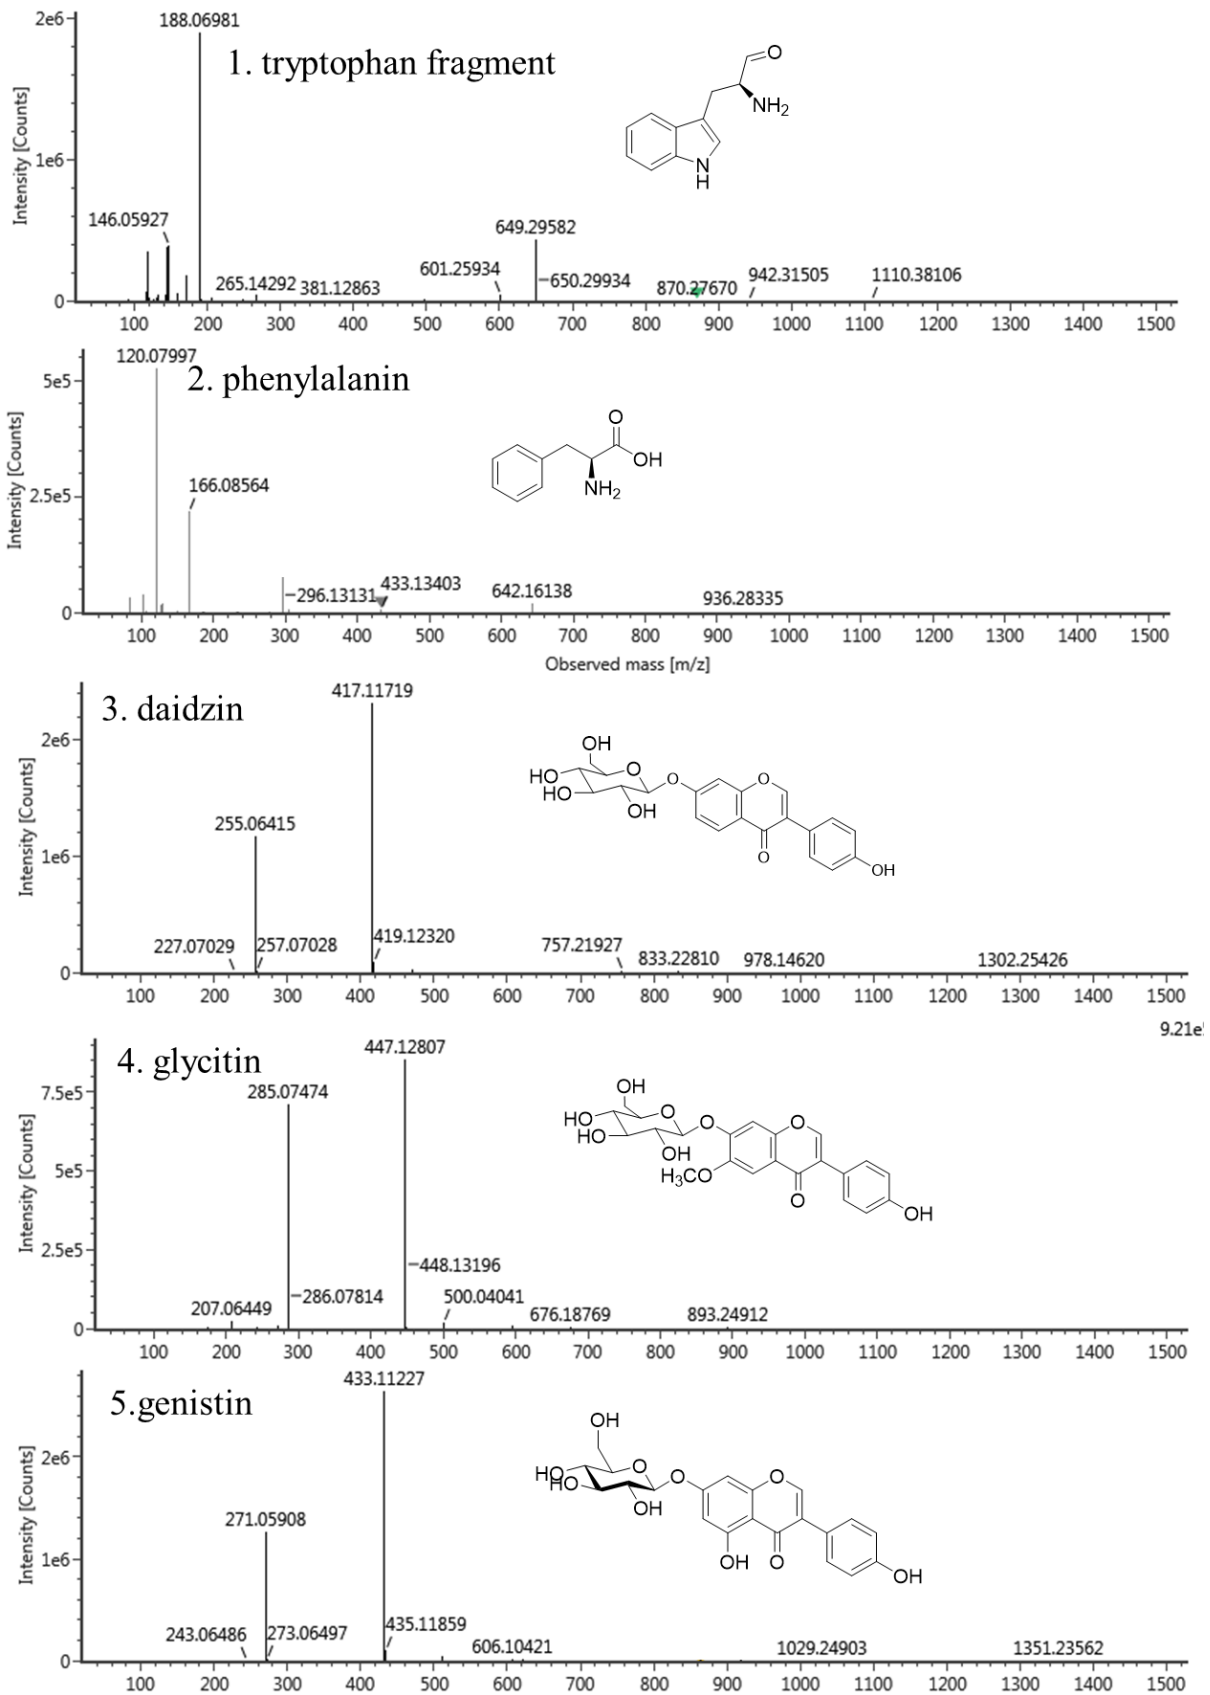

**Fig. S5.** Molecular ions and elementary compositions of the identified phytochemicals by mass spectra Mass fragmentation patterns of flavonoids and amino acids.



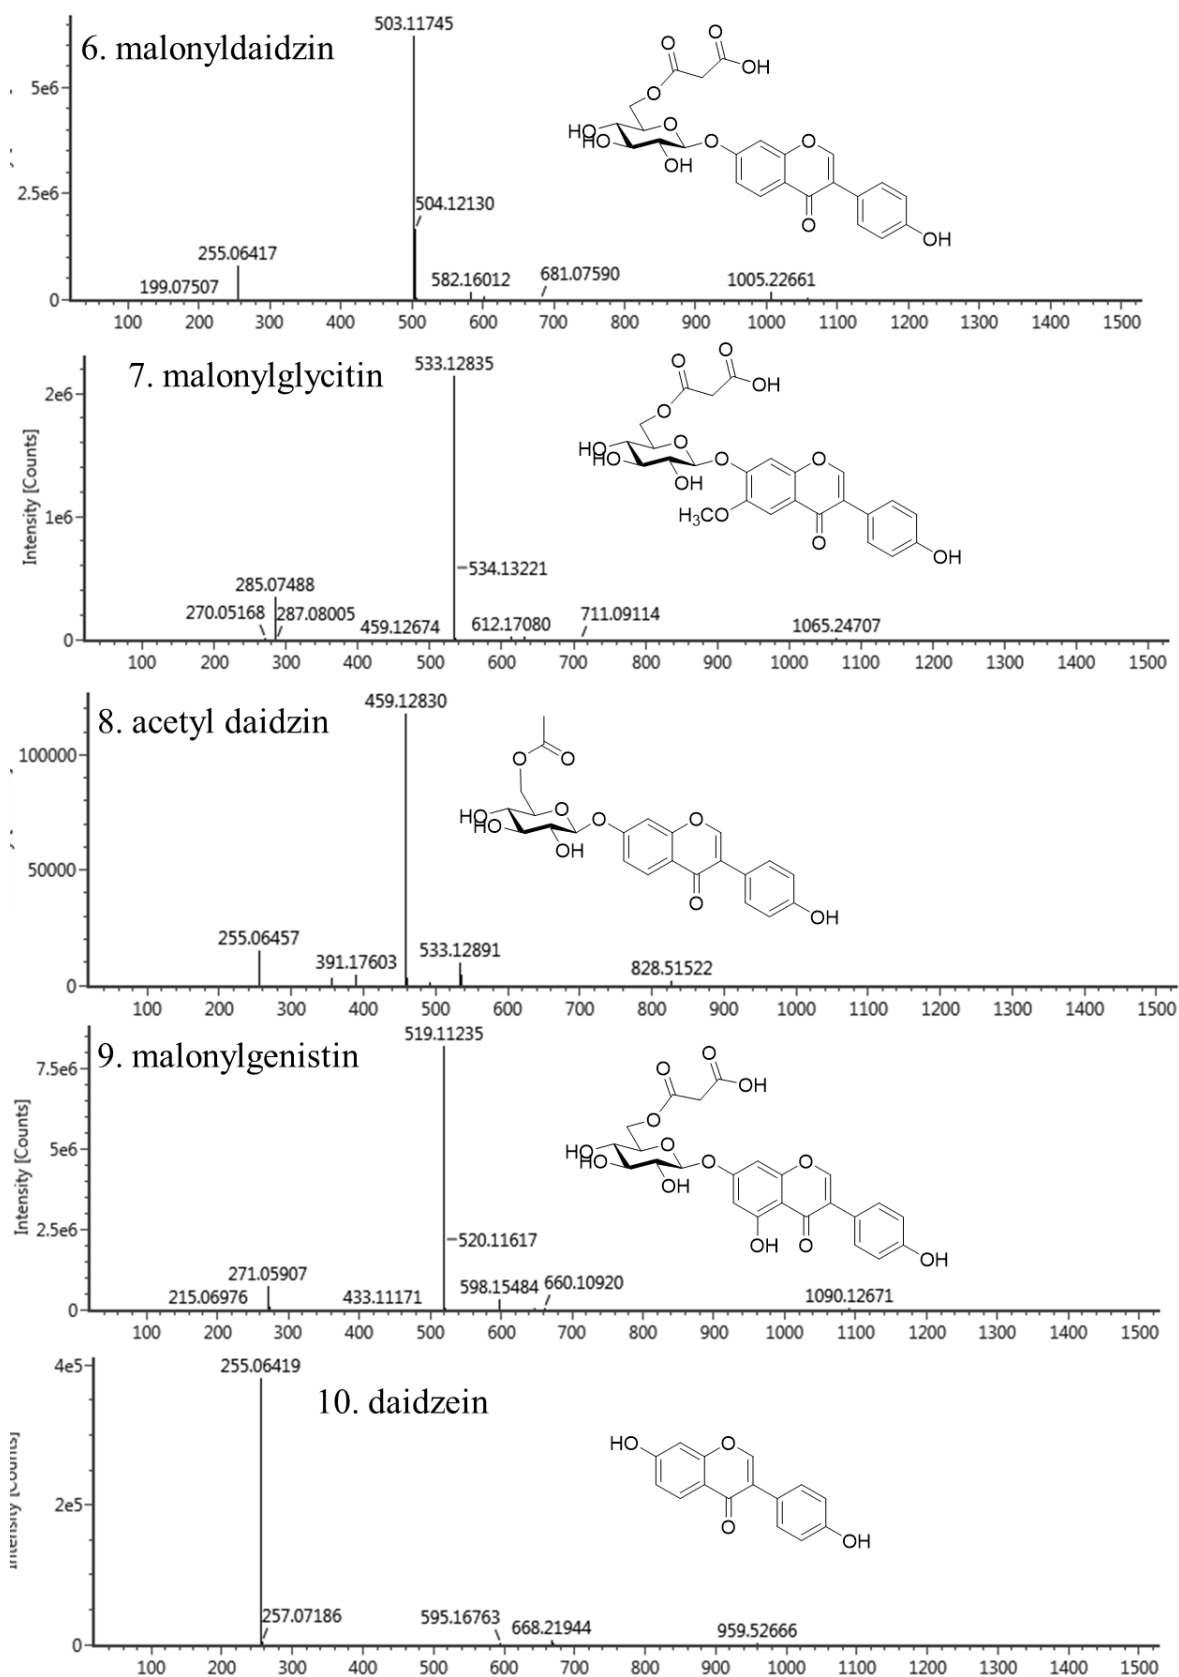

**Fig. S6.** Molecular ions and elementary compositions of the identified phytochemicals by mass spectra Mass fragmentation patterns of flavonoids.

## REFERENCES

- Decroos, K., Vincken, J. P., Heng, L., Bakker, R., Gruppen, H., & Verstraete, W. (2005). Simultaneous quantification of differently glycosylated, acetylated, and 2,3-dihydro-2,5-dihydroxy-6-methyl-4H-pyran-4-one-conjugated soyasaponins using reversed-phase high-performance liquid chromatography with evaporative light scattering detection. *Journal of Chromatography A*, 1072(2), 185–193. <https://doi.org/10.1016/j.chroma.2005.03.021>
- Dueñas, M., Hernández, T., Robredo, S., Lamparski, G., Estrella, I., & Muñoz, R. (2012). Bioactive phenolic compounds of soybean (*Glycine max* cv. Merit): modifications by different microbiological fermentations. *Polish Journal of Food and Nutrition Sciences*, 62(4), 241–250. <https://doi.org/10.2478/v10222-012-0060-x>
- Gu, E. J., Kim, D. W., Jang, G. J., Song, S. H., Lee, J. I., Lee, S. B., Kim, B. M., Cho, Y., Lee, H. J., & Kim, H. J. (2017). Mass-based metabolomic analysis of soybean sprouts during germination. *Food Chemistry*, 217, 311–319. <https://doi.org/10.1016/j.foodchem.2016.08.113>
- Guajardo-Flores, D., García-Patiño, M., Serna-Guerrero, D., Gutiérrez-Urbe, J. A., & Serna-Saldívar, S. O. (2012). Characterization and quantification of saponins and flavonoids in sprouts, seed coats and cotyledons of germinated black beans. *Food Chemistry*, 134(3), 1312–1319. <https://doi.org/10.1016/j.foodchem.2012.03.020>
- Ha, T. J., Lee, B. W., Park, K. H., Jeong, S. H., Kim, H. T., Ko, J. M., Baek, I. Y., & Lee, J. H. (2014). Rapid characterisation and comparison of saponin profiles in the seeds of Korean leguminous species using ultra performance liquid chromatography with photodiode array detector and electrospray ionisation/mass spectrometry (UPLC-PDA-ESI/MS) analysis. *Food Chemistry*, 146, 270–277. <https://doi.org/10.1016/j.foodchem.2013.09.051>
- Kim, M. J., Yang, H. J., Kim, J. H., Ahn, C. W., Lee, J. H., Kim, K. S., & Kwon, D. Y. (2013). Obesity-related metabolomic analysis of human subjects in black soybean peptide intervention study by ultraperformance liquid chromatography and quadrupole-time-of-flight mass spectrometry. *Journal of Obesity*, 2013. <https://doi.org/10.1155/2013/874981>
- Krishnamurthy, P., Lee, J. M., Tsukamoto, C., Takahashi, Y., Singh, R. J., Lee, J. D., & Chung, G. (2014). Evaluation of genetic structure of Korean wild soybean (*Glycine soja*) based on saponin allele polymorphism. *Genetic Resources and Crop Evolution*, 61(6), 1121–1130. <https://doi.org/10.1007/s10722-014-0095-4>
- Shen, D., Wu, Q., Sciarappa, W. J., & Simon, J. E. (2012). Chromatographic fingerprints and quantitative analysis of isoflavones in Tofu-type soybeans. *Food Chemistry*, 130(4), 1003–1009. <https://doi.org/10.1016/j.foodchem.2011.07.121>
